# Supplementary material for: Edible bird's nest regulates glucose and lipid metabolic disorders via the gut–liver axis in obese mice
Source: Royal Society of Chemistry journal article supplement (doi:10.1039/d4fo00563e), 2024-01-01
Supplement: d4fo00563e2.pdf [file d4fo00563e2.pdf]

## Edible bird's nest regulates glucose and lipid metabolic disorders via the gut–liver axis in obese mice

Table S1. Primer sequences used for real-time PCR

| Gene    | Gen Bank No.   | Forward primer 5'-3'  | Reverse primer 5'-3'  |
|---------|----------------|-----------------------|-----------------------|
| Per2    | NM 011388.3    | ACCAGCTGCTAATGTCCAGTG | CATATCCGCGTTCTTCACGA  |
| BHLHE41 | NM 024469.2    | TACAGCATGGAGCAGGTTGA  | TCACTGAAGGCGTCCTTCTTA |
| Elovl3  | NM 001374665.1 | CTCATCGTTGTTGGCCAGAC  | TGCCATAAACTTCCACATCCT |
| Slc51a  | NM 145932.3    | CCCAGCTCCTGAGAGCACT   | GGGCAAAGGGTGTTCCTTGT  |
| Fom3    | NM 008030.2    | GCTGCCATCAGGAGCTGTCT  | GTTGGTGAAGACCGATTGGTA |
| Mgat4c  | NM 001162368.1 | TTCTGGAAGGCGACAAGCA   | GGCAGCCAGATAGCGATAAG  |
| Tlr2    | NM 011905.3    | GGATCTTGGTGGCCATAACA  | TCCGGAGGGAATAGAGGTGA  |
| Fxr     | NM 001163504.1 | TTCCTCAAGTTCAGCCACAGA | GCATTCGCCTGAGTTCATAGA |
| TGR5    | NM 174985.2    | ACCATCAGGGCTACTGGTCC  | CTGCAACACTGCCATGTAGC  |
| Slc10a2 | NM 011388.3    | GTCTGTGGCCTCTGGCATC   | TCCATGTGCGCCATCTATCCA |
| Lrp1    | NM 008512.2    | GACTGCATGGATGGCTCAGA  | TGCCATACACGGAACACTCG  |
| Pppara  | NM 011144.6    | CTGGCCACATCCATCCAAC   | GCTCTCCTCACCGATGGACT  |
